# Supplementary material
Source: PubMed Central journal article supplement (PMC7356415)
Supplement: tpmd190243.SD1.pdf [file tpmd190243.SD1.pdf]

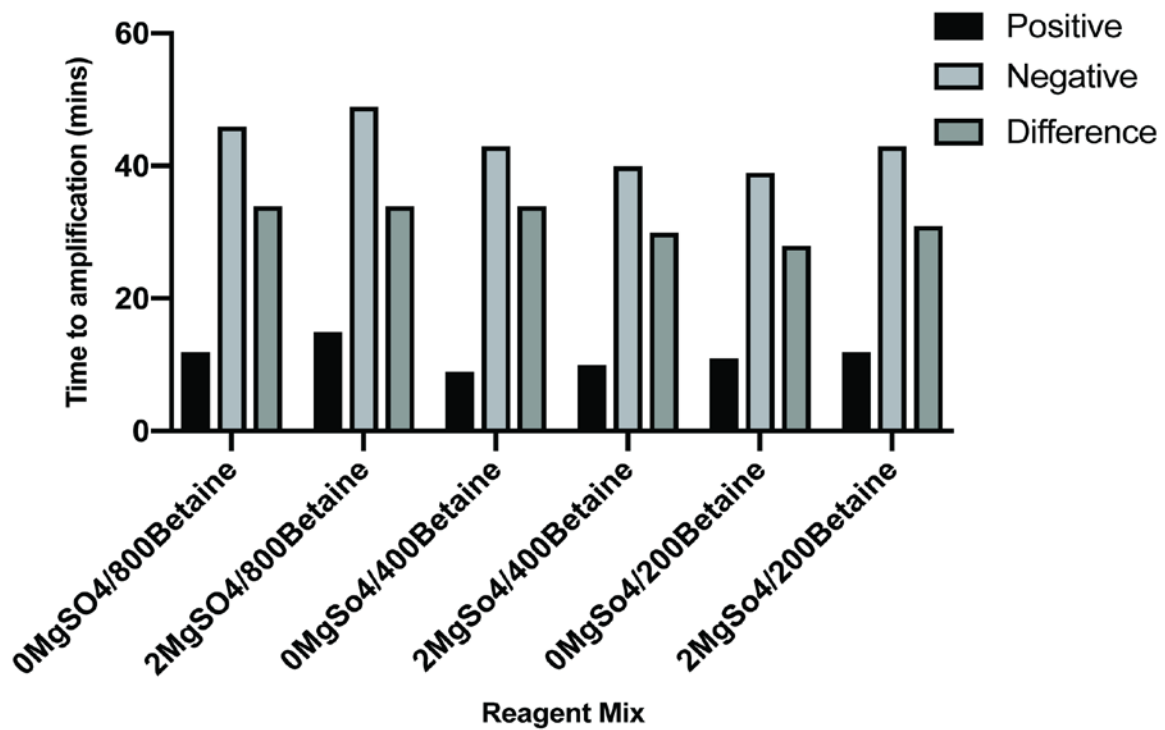

**Supplemental Figure 1:** Assay optimization using varying concentrations of MgSO<sub>4</sub> and betaine

The amplification time difference between the DNA positive and negative samples of 33 minutes, 30 minutes and 32 minutes respectively in reactions containing 2mM MgSO<sub>4</sub> and 800mM, 400mM and 200mM of betaine respectively. In reactions containing 800mM, 400mM and 200mM of betaine and no MgSO<sub>4</sub>, the reaction time difference between the negatives and positives were 36minutes, 33minutes and 28minutes respectively. There was no amplification when 6mM of MgSO<sub>4</sub> was added to the reaction containing 800mM, 400mM and 200mM of betaine.

| ID:31 |       | dimer(minimum)dG=-2.46 |     |      |      |      |        |                                              |
|-------|-------|------------------------|-----|------|------|------|--------|----------------------------------------------|
| label | 5'pos | 3'pos                  | len | Tm   | 5'dG | 3'dG | GCrate | Sequence                                     |
| F3    | 761   | 778                    | 18  | 59.1 | -4.2 | -6.3 | 0.56   | AGAAGTCCTGCTGCAACG                           |
| B3    | 933   | 952                    | 20  | 60.2 | -5.1 | -5.3 | 0.5    | AGGTCTGCACATTCATGCTG                         |
| FIP   |       |                        | 41  |      |      |      |        | TTGTCTTGGCAGTCCTGACAGG-GTAGTACGTGCTGCACGAA   |
| BIP   |       |                        | 42  |      |      |      |        | GTTTCGGTGTACGCGACAGACAC-GCACCAAGGCTAAAGAGGAA |
| F2    | 779   | 797                    | 19  | 59.2 | -3.3 | -5.4 | 0.53   | GTAGTACGTGCTGCACGAA                          |
| F1c   | 821   | 842                    | 22  | 64.3 | -4.4 | -5.4 | 0.55   | TTGTCTTGGCAGTCCTGACAGG                       |
| B2    | 907   | 926                    | 20  | 59.6 | -6.4 | -4.7 | 0.5    | GCACCAAGGCTAAAGAGGAA                         |
| B1c   | 845   | 866                    | 22  | 65.2 | -5.8 | -4.9 | 0.59   | GTTTCGGTGTACGCGACAGACAC                      |

**Supplemental Table 1:** Primers used in the development of the assay

GTGCTCCGCTTGCCAACTGCGCGCGCGTGCATTACAATGGGCACCATGATCAGAC  
ATACATTTACGCATAGGTGCGGAGCGCTCCTGTGCGCGCTGGCGTTGGGAAGCTC  
CACTATGGCTGCGACCGCCGCTGCAAAGCCAAGACGACGGGGCAAATGCAGAA  
ATTGCGGCGGGCGGCCGGTGTGGGCGCCCACCGGGCGGGCGGTATGCGTCTTTGG  
ACGGTGCCTTTACCGCGCTGGCAAATGATGCAAGTTTCTTTGAGGCAAATCCGGC  
AGGAAGTGCGAACATGACGCACGGGGAGCTGGCTTTCTTCCATACCACTGGCTTT  
GGCTCGTTTTACGCCGAAACGCTTTTCTACGTTGGCCAGCGGGGCAAATGGGGAT  
ACGGCGCGTTCGATGCGTATGTTTTTCCCCGAATCCGGGTTTAACTTTTCTACCACC  
ACGGAGACCGTGTGCACACCTGCTTCGGCCCCATTAAGCAGCGCGGGGCAATT  
GGAATCATCAACTTTGCCCGGCGTATCGGGGGTCTCTCCCTGGGAGCCAACCTGA  
AGGCGGGGTTCCGCGACGCGCAGGGCCTGCAGCACACCTCTGTCTCCAGTGACA  
TCGGTTTGCAGTGGGTGGGGAACGTTGCCAAGTCCTTTACCTCTGAGGAGCCCAA  
CCTGTACATCGGGCTTGCGGCCACCAACTTGGGATTGACCGTAAAGGTCTCGGAC  
AAGATAGAGAACTGCACGAGTACCTGTGAAAAGTGTGGTTGCTGCAAGGAGAAGT  
CCTGCTGCAACGGTAGTACGTGCTGCACGAAGAAGTGCGAAGGCTGTAAGTCCCC  
CTGTCAGGACTGCCAAGACAAAGGTTTCGGTGTACGCGACAGACACCATGCTGCGT  
GCAGGGTTTTCGTACCGGCCCTTCAGCTGGTTCCTCTTTAGCCTTGGTGCCACCA  
CCAGCATGAATGTGCAGACCTTGGCTAGTAACGCCAAGTCGCTGTACGAGAATCT  
GGCTTACAGCATAGGCGCCATGTTTGATCCCTTCAGCTTCCTGAGCTTGAGTTCGA  
GCTTCCGCATCAACCACAAGGCTAACATGCGAGTGAGAGTGGGTGCACAGGCGC  
GAAGGCTTCGCACTACCTTTCTTGGGTGGCGCGATACTGCTCGGCCGAAATTAAT  
TCATAA

**Supplemental Figure 2:** The 200 bp sequence of tp0967 with the location of primers used in the assay
